# Supplementary material
Source: MDPI journal article supplement (https://www.mdpi.com/1424-2818/14/3/191)
Supplement: s1 [file s1]

## Supplementary

**Table S1.** Accession numbers and basic characteristics of DNA barcodes used to create local reference database for grass pollen metabarcoding. \* - the sequenced in this work

| Binomial species name           | MSU Herbarium voucher | GenBank accession | Length, bp | GC-content |
|---------------------------------|-----------------------|-------------------|------------|------------|
| trnL-F intergenic spacer        |                       |                   |            |            |
| <i>Alopecurus pratensis</i> *   | MW0227587             | MW392193          | 341        | 30%        |
| <i>Alopecurus pratensis</i> *   | MW0227686             | MW392194          | 341        | 30%        |
| <i>Arrhenatherum elatius</i> *  | MW0200303             | MW392195          | 336        | 31%        |
| <i>Arrhenatherum elatius</i> *  | MW0235748             | MW392196          | 336        | 31%        |
| <i>Briza media</i> *            | MW0240831             | MW392197          | 343        | 32%        |
| <i>Briza media</i> *            | MW0564129             | MW392198          | 342        | 32%        |
| <i>Bromus inermis</i> *         | MW0252346             | MW392199          | 362        | 29%        |
| <i>Bromus inermis</i> *         | MW0564336             | MW392200          | 362        | 29%        |
| <i>Calamagrostis epigeios</i> * | MW0232221             | MW392201          | 340        | 32%        |
| <i>Calamagrostis epigeios</i> * | MW0232325             | MW392202          | 340        | 32%        |
| <i>Dactylis glomerata</i> *     | MW0241080             | MW392203          | 352        | 31%        |
| <i>Dactylis glomerata</i> *     | MW0241082             | MW392204          | 352        | 31%        |
| <i>Elymus repens</i>            |                       | KP210964          | 350        | 29%        |
| <i>Elymus repens</i> *          | MW1072493             | MW392205          | 342        | 30%        |
| <i>Elymus repens</i> *          | MW0200523             | MW392207          | 324        | 29%        |
| <i>Elymus repens</i> *          | MW0564353             | MW392206          | 308        | 30%        |
| <i>Festuca pratensis</i> *      | MW0249535             | MW392208          | 342        | 32%        |
| <i>Festuca pratensis</i> *      | MW0564330             | MW392209          | 342        | 32%        |
| <i>Lolium perenne</i> *         | MW0255247             | MW392210          | 346        | 33%        |
| <i>Lolium perenne</i> *         | MW0564348             | MW392211          | 347        | 32%        |
| <i>Phleum pratense</i> *        | MW1072502             | MW392212          | 345        | 30%        |
| <i>Phleum pratense</i> *        | MW0226359             | MW415936          | 345        | 30%        |
| <i>Phleum pratense</i> *        | MW0226397             | MW392213          | 345        | 30%        |
| <i>Poa annua</i> *              | MW0242177             | MW392214          | 340        | 29%        |
| <i>Poa annua</i> *              | MW0242179             | MW392215          | 342        | 30%        |
| <i>Poa pratensis</i>            |                       | KX522664          | 363        | 30%        |
| <i>Poa pratensis</i> *          | MW0564191             | MW392216          | 363        | 30%        |
| <i>Poa supina</i> *             | MW0560039             | MW392217          | 340        | 29%        |
| <i>Poa supina</i> *             | MW0560040             | MW392218          | 340        | 29%        |
| <i>Poa trivialis</i>            |                       | KX522672          | 307        | 29%        |
| <i>Poa trivialis</i>            |                       | KX522673          | 307        | 29%        |
| <i>Poa trivialis</i> *          | MW0564230             | MW392219          | 307        | 29%        |
| <i>Poa trivialis</i> *          | MW0564234             | MW392220          | 307        | 29%        |
| 5'-ETS                          |                       |                   |            |            |

|                                 |           |          |     |     |
|---------------------------------|-----------|----------|-----|-----|
| <i>Alopecurus pratensis</i>     |           | KM523686 | 228 | 56% |
| <i>Alopecurus pratensis</i> *   | MW0227587 | MW392221 | 228 | 55% |
| <i>Alopecurus pratensis</i> *   | MW0227686 | MW392222 | 228 | 55% |
| <i>Arrhenatherum elatius</i>    |           | KR052874 | 214 | 54% |
| <i>Arrhenatherum elatius</i>    |           | KP325243 | 214 | 53% |
| <i>Arrhenatherum elatius</i> *  | MW1072498 | MW415938 | 214 | 54% |
| <i>Arrhenatherum elatius</i> *  | MW0200303 | MW392223 | 214 | 54% |
| <i>Arrhenatherum elatius</i> *  | MW0235748 | MW392224 | 214 | 54% |
| <i>Briza media</i>              |           | KP325258 | 229 | 54% |
| <i>Briza media</i> *            | MW1067092 | MW415939 | 229 | 54% |
| <i>Briza media</i> *            | MW0240831 | MW392225 | 229 | 54% |
| <i>Briza media</i> *            | MW0564129 | MW392226 | 229 | 54% |
| <i>Bromus inermis</i>           |           | KP996917 | 444 | 53% |
| <i>Bromus inermis</i>           |           | KP996918 | 444 | 53% |
| <i>Bromus inermis</i>           |           | KP996912 | 444 | 53% |
| <i>Bromus inermis</i>           |           | KP996919 | 444 | 53% |
| <i>Bromus inermis</i>           |           | KP996920 | 444 | 53% |
| <i>Bromus inermis</i>           |           | KP996915 | 444 | 53% |
| <i>Bromus inermis</i>           |           | KP996913 | 444 | 53% |
| <i>Bromus inermis</i>           |           | KP996916 | 444 | 53% |
| <i>Bromus inermis</i>           |           | KP996914 | 444 | 53% |
| <i>Bromus inermis</i>           |           | KP996911 | 444 | 53% |
| <i>Bromus inermis</i>           |           | KJ632440 | 444 | 53% |
| <i>Bromus inermis</i> *         | MW0252346 | MW392227 | 444 | 53% |
| <i>Bromus inermis</i> *         | MW0564336 | MW392228 | 444 | 53% |
| <i>Calamagrostis epigeios</i>   |           | KX872343 | 176 | 54% |
| <i>Calamagrostis epigeios</i>   |           | KX872344 | 176 | 54% |
| <i>Calamagrostis epigeios</i>   |           | KX872345 | 176 | 54% |
| <i>Calamagrostis epigeios</i>   |           | KX872342 | 176 | 54% |
| <i>Calamagrostis epigeios</i> * | MW1072496 | MW415941 | 176 | 54% |
| <i>Calamagrostis epigeios</i> * | MW0232221 | MW392229 | 175 | 54% |
| <i>Calamagrostis epigeios</i> * | MW0232325 | MW392230 | 175 | 54% |
| <i>Dactylis glomerata</i>       |           | KJ599050 | 228 | 54% |
| <i>Dactylis glomerata</i> *     | MW0241080 | MW392231 | 228 | 54% |
| <i>Dactylis glomerata</i> *     | MW0241082 | MW392232 | 228 | 54% |
| <i>Elymus repens</i>            |           | KP325283 | 220 | 59% |
| <i>Elymus repens</i> *          | MW1072493 | MW415943 | 220 | 59% |
| <i>Elymus repens</i> *          | MW0200523 | MW392233 | 220 | 59% |
| <i>Elymus repens</i> *          | MW0564353 | MW392234 | 220 | 59% |
| <i>Festuca arundinacea</i>      |           | KJ599100 | 230 | 53% |
| <i>Festuca arundinacea</i>      |           | KJ599101 | 230 | 53% |
| <i>Festuca arundinacea</i>      |           | KP325284 | 230 | 54% |
| <i>Festuca arundinacea</i>      |           | KP997002 | 230 | 54% |

|                               |                        |          |     |     |
|-------------------------------|------------------------|----------|-----|-----|
|                               | Fearu_2                |          |     |     |
| <i>Festuca arundinacea</i> *  | (laboratory herbarium) | MW415944 | 230 | 53% |
| <i>Festuca pratensis</i>      |                        | KJ599105 | 230 | 50% |
| <i>Festuca pratensis</i>      |                        | JN187582 | 230 | 53% |
| <i>Festuca pratensis</i>      |                        | KP325293 | 230 | 53% |
| <i>Festuca pratensis</i> *    | MW1072495              | MW415945 | 230 | 53% |
| <i>Festuca pratensis</i> *    | MW0249535              | MW392235 | 230 | 53% |
| <i>Festuca pratensis</i> *    | MW0564330              | MW392236 | 230 | 53% |
| <i>Lolium perenne</i>         |                        | JN187583 | 230 | 54% |
| <i>Lolium perenne</i>         |                        | KP325315 | 230 | 54% |
| <i>Lolium perenne</i>         |                        | KJ599109 | 230 | 54% |
| <i>Lolium perenne</i> *       | MW0255247              | MW392237 | 232 | 53% |
| <i>Lolium perenne</i> *       | MW0564348              | MW392238 | 232 | 53% |
| <i>Phleum pratense</i>        |                        | KM523723 | 228 | 56% |
| <i>Phleum pratense</i>        |                        | GQ324284 | 228 | 56% |
| <i>Phleum pratense</i>        |                        | KM523722 | 228 | 56% |
| <i>Phleum pratense</i> *      | MW1072502              | MW392239 | 228 | 56% |
| <i>Phleum pratense</i> *      | MW0226359              | MW415937 | 228 | 56% |
| <i>Phleum pratense</i> *      | MW0226397              | MW392240 | 228 | 56% |
| <i>Poa annua</i> *            | MW0242177              | MW392241 | 492 | 56% |
| <i>Poa annua</i> *            | MW0242179              | MW392242 | 492 | 56% |
| <i>Poa palustris</i>          |                        | KY378822 | 231 | 55% |
|                               | Popal_2                |          |     |     |
| <i>Poa palustris</i> *        | (laboratory herbarium) | MW415948 | 231 | 55% |
| <i>Poa pratensis</i>          |                        | KJ599036 | 233 | 52% |
| <i>Poa pratensis</i>          |                        | KP325350 | 233 | 53% |
| <i>Poa pratensis</i>          |                        | GQ324369 | 233 | 53% |
| <i>Poa pratensis</i> *        | MW1072499              | MW415949 | 233 | 52% |
| <i>Poa pratensis</i> *        | MW0564191              | MW392243 | 233 | 52% |
| <i>Poa supina</i> *           | MW1070008              | MW415950 | 509 | 55% |
| <i>Poa supina</i> *           | MW0560039              | MW392244 | 509 | 55% |
| <i>Poa supina</i> *           | MW0560040              | MW392245 | 509 | 55% |
| <i>Poa trivialis</i>          |                        | GQ324387 | 232 | 53% |
| <i>Poa trivialis</i> *        | MW1070015              | MW415951 | 232 | 53% |
| <i>Poa trivialis</i> *        | MW0564230              | MW392246 | 232 | 53% |
| <i>Poa trivialis</i> *        | MW0564234              | MW392247 | 232 | 53% |
| ITS1                          |                        |          |     |     |
| <i>Alopecurus pratensis</i>   |                        | HQ600523 | 202 | 62% |
| <i>Alopecurus pratensis</i>   |                        | KM523762 | 202 | 61% |
| <i>Alopecurus pratensis</i>   |                        | MK809298 | 201 | 61% |
| <i>Alopecurus pratensis</i>   |                        | MK809299 | 201 | 61% |
| <i>Alopecurus pratensis</i> * | MW0227587              | MW390889 | 202 | 61% |
| <i>Alopecurus pratensis</i> * | MW0227686              | MW390890 | 202 | 61% |
| <i>Arrhenatherum elatius</i>  |                        | AF019795 | 200 | 63% |

|                               |           |          |     |     |
|-------------------------------|-----------|----------|-----|-----|
| <i>Arrhenatherum elatius</i>  |           | AM049253 | 200 | 63% |
| <i>Arrhenatherum elatius</i>  |           | DQ336821 | 200 | 63% |
| <i>Arrhenatherum elatius</i>  |           | DQ995405 | 198 | 63% |
| <i>Arrhenatherum elatius</i>  |           | FJ766147 | 200 | 65% |
| <i>Arrhenatherum elatius</i>  |           | FM179388 | 200 | 63% |
| <i>Arrhenatherum elatius</i>  |           | JF904803 | 200 | 63% |
| <i>Arrhenatherum elatius</i>  |           | KP295984 | 200 | 63% |
| <i>Arrhenatherum elatius</i>  |           | KU883487 | 200 | 63% |
| <i>Arrhenatherum elatius</i>  |           | KX872932 | 200 | 63% |
| <i>Arrhenatherum elatius</i>  |           | Z96878   | 197 | 61% |
| <i>Arrhenatherum elatius</i>  |           | Z96880   | 201 | 61% |
| <i>Arrhenatherum elatius</i>  |           | Z96882   | 200 | 61% |
| <i>Arrhenatherum elatius*</i> | MW0200303 | MW390891 | 200 | 63% |
| <i>Arrhenatherum elatius*</i> | MW0235748 | MW390892 | 200 | 63% |
| <i>Briza media</i>            |           | DQ539583 | 200 | 62% |
| <i>Briza media</i>            |           | FM179393 | 200 | 62% |
| <i>Briza media</i>            |           | KP296001 | 200 | 62% |
| <i>Briza media</i>            |           | KU883466 | 200 | 62% |
| <i>Briza media</i>            |           | KU883467 | 200 | 63% |
| <i>Briza media</i>            |           | KU883468 | 200 | 63% |
| <i>Briza media</i>            |           | KU883469 | 200 | 62% |
| <i>Briza media</i>            |           | KU883470 | 200 | 63% |
| <i>Briza media</i>            |           | MT937109 | 200 | 63% |
| <i>Briza media*</i>           | MW0240831 | MW390893 | 200 | 61% |
| <i>Briza media*</i>           | MW0564129 | MW390894 | 200 | 61% |
| <i>Bromus inermis</i>         |           | AY367915 | 200 | 55% |
| <i>Bromus inermis</i>         |           | HQ600548 | 200 | 57% |
| <i>Bromus inermis</i>         |           | KF713192 | 200 | 56% |
| <i>Bromus inermis</i>         |           | KF713193 | 200 | 55% |
| <i>Bromus inermis</i>         |           | KF713194 | 200 | 56% |
| <i>Bromus inermis</i>         |           | KM077290 | 200 | 56% |
| <i>Bromus inermis</i>         |           | KP987400 | 200 | 56% |
| <i>Bromus inermis</i>         |           | KP987401 | 200 | 56% |
| <i>Bromus inermis</i>         |           | KP987402 | 201 | 56% |
| <i>Bromus inermis</i>         |           | KP987403 | 200 | 56% |
| <i>Bromus inermis</i>         |           | KP987404 | 200 | 56% |
| <i>Bromus inermis</i>         |           | KP987405 | 200 | 56% |
| <i>Bromus inermis</i>         |           | KP987406 | 200 | 56% |
| <i>Bromus inermis</i>         |           | KP987407 | 200 | 56% |
| <i>Bromus inermis</i>         |           | KP987408 | 201 | 56% |
| <i>Bromus inermis</i>         |           | KP987409 | 200 | 55% |
| <i>Bromus inermis</i>         |           | MH808794 | 200 | 56% |
| <i>Bromus inermis</i>         |           | MW270937 | 201 | 55% |
| <i>Bromus inermis</i>         |           | MW349610 | 201 | 55% |
| <i>Bromus inermis*</i>        | MW0252346 | MW390895 | 200 | 55% |
| <i>Bromus inermis*</i>        | MW0564336 | MW390896 | 200 | 55% |

|                                 |           |          |     |     |
|---------------------------------|-----------|----------|-----|-----|
| <i>Calamagrostis epigeios</i>   |           | AJ306448 | 200 | 66% |
| <i>Calamagrostis epigeios</i>   |           | AJ306449 | 200 | 66% |
| <i>Calamagrostis epigeios</i>   |           | FJ821781 | 200 | 67% |
| <i>Calamagrostis epigeios</i>   |           | HQ600525 | 200 | 65% |
| <i>Calamagrostis epigeios</i>   |           | KF713208 | 200 | 65% |
| <i>Calamagrostis epigeios</i>   |           | KF713209 | 200 | 66% |
| <i>Calamagrostis epigeios</i>   |           | KF713210 | 200 | 66% |
| <i>Calamagrostis epigeios</i>   |           | KF713211 | 200 | 66% |
| <i>Calamagrostis epigeios</i>   |           | KP711072 | 200 | 66% |
| <i>Calamagrostis epigeios</i>   |           | KU883491 | 200 | 66% |
| <i>Calamagrostis epigeios</i>   |           | KX872963 | 200 | 66% |
| <i>Calamagrostis epigeios</i>   |           | KX872964 | 200 | 66% |
| <i>Calamagrostis epigeios</i>   |           | KX872965 | 200 | 66% |
| <i>Calamagrostis epigeios</i>   |           | KX872966 | 200 | 66% |
| <i>Calamagrostis epigeios</i>   |           | MT396551 | 200 | 66% |
| <i>Calamagrostis epigeios</i>   |           | MT937110 | 200 | 66% |
| <i>Calamagrostis epigeios</i> * | MW0232221 | MW390897 | 200 | 65% |
| <i>Calamagrostis epigeios</i> * | MW0232325 | MW390898 | 200 | 66% |
| <i>Dactylis glomerata</i>       |           | AF393013 | 190 | 62% |
| <i>Dactylis glomerata</i>       |           | HQ600543 | 194 | 63% |
| <i>Dactylis glomerata</i>       |           | KF713212 | 194 | 63% |
| <i>Dactylis glomerata</i>       |           | KF713213 | 194 | 63% |
| <i>Dactylis glomerata</i>       |           | KF713214 | 194 | 63% |
| <i>Dactylis glomerata</i>       |           | KF713215 | 194 | 63% |
| <i>Dactylis glomerata</i>       |           | KF713216 | 194 | 63% |
| <i>Dactylis glomerata</i>       |           | KJ598940 | 194 | 63% |
| <i>Dactylis glomerata</i>       |           | KU883493 | 194 | 63% |
| <i>Dactylis glomerata</i>       |           | MH808808 | 194 | 63% |
| <i>Dactylis glomerata</i>       |           | MT784108 | 194 | 63% |
| <i>Dactylis glomerata</i>       |           | MT796498 | 194 | 63% |
| <i>Dactylis glomerata</i> *     | MW0241080 | MW390899 | 194 | 63% |
| <i>Dactylis glomerata</i> *     | MW0241082 | MW390900 | 194 | 63% |
| <i>Elymus repens</i>            |           | DQ859048 | 204 | 64% |
| <i>Elymus repens</i>            |           | DQ859049 | 204 | 62% |
| <i>Elymus repens</i>            |           | DQ859050 | 204 | 64% |
| <i>Elymus repens</i>            |           | DQ859051 | 204 | 64% |
| <i>Elymus repens</i>            |           | FJ793073 | 204 | 65% |
| <i>Elymus repens</i>            |           | FJ793074 | 204 | 64% |
| <i>Elymus repens</i>            |           | FJ793075 | 200 | 64% |
| <i>Elymus repens</i>            |           | FJ793076 | 200 | 63% |
| <i>Elymus repens</i>            |           | FJ793077 | 204 | 64% |
| <i>Elymus repens</i>            |           | FJ793078 | 204 | 64% |
| <i>Elymus repens</i>            |           | FJ793079 | 200 | 62% |
| <i>Elymus repens</i>            |           | FJ793080 | 204 | 65% |

|                          |           |          |     |     |
|--------------------------|-----------|----------|-----|-----|
| <i>Elymus repens</i>     |           | FJ793081 | 200 | 58% |
| <i>Elymus repens</i>     |           | FJ793082 | 200 | 63% |
| <i>Elymus repens</i>     |           | FJ793083 | 204 | 64% |
| <i>Elymus repens</i>     |           | FJ793084 | 204 | 65% |
| <i>Elymus repens</i>     |           | FJ793085 | 200 | 61% |
| <i>Elymus repens</i>     |           | FJ793086 | 200 | 62% |
| <i>Elymus repens</i>     |           | FJ793087 | 200 | 57% |
| <i>Elymus repens</i>     |           | FJ793095 | 200 | 58% |
| <i>Elymus repens</i>     |           | GQ365145 | 204 | 65% |
| <i>Elymus repens</i>     |           | GQ373266 | 204 | 65% |
| <i>Elymus repens</i>     |           | GQ373267 | 204 | 65% |
| <i>Elymus repens</i>     |           | GQ373268 | 204 | 65% |
| <i>Elymus repens</i>     |           | HE602426 | 200 | 63% |
| <i>Elymus repens</i>     |           | HQ600529 | 204 | 65% |
| <i>Elymus repens</i>     |           | JN009804 | 204 | 64% |
| <i>Elymus repens</i>     |           | JN009831 | 205 | 64% |
| <i>Elymus repens</i>     |           | KF713224 | 204 | 64% |
| <i>Elymus repens</i>     |           | KF713225 | 204 | 64% |
| <i>Elymus repens</i>     |           | KF713226 | 204 | 64% |
| <i>Elymus repens</i>     |           | KF713227 | 204 | 64% |
| <i>Elymus repens</i>     |           | KF713228 | 204 | 64% |
| <i>Elymus repens</i>     |           | KF713229 | 204 | 64% |
| <i>Elymus repens</i>     |           | KF713230 | 204 | 64% |
| <i>Elymus repens</i>     |           | KF713231 | 204 | 65% |
| <i>Elymus repens</i>     |           | KJ028268 | 204 | 64% |
| <i>Elymus repens</i>     |           | KJ028269 | 204 | 64% |
| <i>Elymus repens</i>     |           | KJ028270 | 204 | 65% |
| <i>Elymus repens</i>     |           | KJ028271 | 204 | 64% |
| <i>Elymus repens</i>     |           | KP296029 | 204 | 64% |
| <i>Elymus repens</i>     |           | MF893160 | 200 | 63% |
| <i>Elymus repens</i>     |           | MF893161 | 204 | 64% |
| <i>Elymus repens</i>     |           | MH500773 | 204 | 65% |
| <i>Elymus repens</i> *   | MW0200523 | MW390901 | 204 | 65% |
| <i>Elymus repens</i> *   | MW0564353 | MW390902 | 200 | 63% |
| <i>Festuca pratensis</i> |           | AF171144 | 202 | 59% |
| <i>Festuca pratensis</i> |           | AF171178 | 202 | 59% |
| <i>Festuca pratensis</i> |           | AF171179 | 202 | 59% |
| <i>Festuca pratensis</i> |           | AF171180 | 202 | 59% |
| <i>Festuca pratensis</i> |           | AF171181 | 202 | 59% |
| <i>Festuca pratensis</i> |           | AF303421 | 202 | 59% |
| <i>Festuca pratensis</i> |           | AF532948 | 202 | 58% |
| <i>Festuca pratensis</i> |           | AJ240151 | 202 | 59% |
| <i>Festuca pratensis</i> |           | AJ240152 | 202 | 59% |
| <i>Festuca pratensis</i> |           | EF379042 | 202 | 59% |
| <i>Festuca pratensis</i> |           | EF379043 | 202 | 59% |
| <i>Festuca pratensis</i> |           | EF379044 | 202 | 59% |

|                            |           |          |     |     |
|----------------------------|-----------|----------|-----|-----|
| <i>Festuca pratensis</i>   |           | EF379045 | 202 | 59% |
| <i>Festuca pratensis</i>   |           | EF379046 | 202 | 60% |
| <i>Festuca pratensis</i>   |           | EF379047 | 202 | 59% |
| <i>Festuca pratensis</i>   |           | HM453173 | 202 | 59% |
| <i>Festuca pratensis</i>   |           | HQ110717 | 202 | 59% |
| <i>Festuca pratensis</i>   |           | JN187604 | 202 | 59% |
| <i>Festuca pratensis</i>   |           | KF917345 | 202 | 59% |
| <i>Festuca pratensis</i>   |           | KF917346 | 202 | 59% |
| <i>Festuca pratensis</i>   |           | KF917347 | 202 | 59% |
| <i>Festuca pratensis</i>   |           | KF917348 | 202 | 59% |
| <i>Festuca pratensis</i>   |           | KF917349 | 202 | 59% |
| <i>Festuca pratensis</i>   |           | KJ598995 | 202 | 59% |
| <i>Festuca pratensis</i>   |           | KP296039 | 202 | 59% |
| <i>Festuca pratensis</i>   |           | MT145299 | 202 | 59% |
| <i>Festuca pratensis</i> * | MW0249535 | MW390903 | 202 | 59% |
| <i>Festuca pratensis</i> * | MW0564330 | MW390904 | 202 | 59% |
| <i>Lolium perenne</i>      |           | AF171143 | 202 | 59% |
| <i>Lolium perenne</i>      |           | AF171171 | 202 | 59% |
| <i>Lolium perenne</i>      |           | AF171172 | 202 | 59% |
| <i>Lolium perenne</i>      |           | AF171173 | 202 | 59% |
| <i>Lolium perenne</i>      |           | AF303401 | 202 | 59% |
| <i>Lolium perenne</i>      |           | AJ240137 | 202 | 59% |
| <i>Lolium perenne</i>      |           | AJ240138 | 202 | 59% |
| <i>Lolium perenne</i>      |           | EF379073 | 202 | 59% |
| <i>Lolium perenne</i>      |           | EF379074 | 202 | 59% |
| <i>Lolium perenne</i>      |           | EF379075 | 202 | 59% |
| <i>Lolium perenne</i>      |           | EU814797 | 202 | 59% |
| <i>Lolium perenne</i>      |           | EU814813 | 202 | 59% |
| <i>Lolium perenne</i>      |           | EU814814 | 202 | 59% |
| <i>Lolium perenne</i>      |           | EU814815 | 202 | 59% |
| <i>Lolium perenne</i>      |           | EU814816 | 202 | 59% |
| <i>Lolium perenne</i>      |           | EU814817 | 202 | 59% |
| <i>Lolium perenne</i>      |           | EU814818 | 202 | 59% |
| <i>Lolium perenne</i>      |           | EU814819 | 202 | 59% |
| <i>Lolium perenne</i>      |           | EU814824 | 202 | 59% |
| <i>Lolium perenne</i>      |           | EU814825 | 202 | 59% |
| <i>Lolium perenne</i>      |           | EU814826 | 202 | 59% |
| <i>Lolium perenne</i>      |           | FJ766169 | 202 | 59% |
| <i>Lolium perenne</i>      |           | HM453191 | 202 | 59% |
| <i>Lolium perenne</i>      |           | JN187605 | 202 | 59% |
| <i>Lolium perenne</i>      |           | KF454873 | 202 | 59% |
| <i>Lolium perenne</i>      |           | KF713246 | 202 | 59% |
| <i>Lolium perenne</i>      |           | KF713247 | 202 | 59% |
| <i>Lolium perenne</i>      |           | KF713248 | 202 | 59% |
| <i>Lolium perenne</i>      |           | KF713249 | 202 | 59% |
| <i>Lolium perenne</i>      |           | KJ598999 | 202 | 58% |

|                          |           |          |     |     |
|--------------------------|-----------|----------|-----|-----|
| <i>Lolium perenne</i>    |           | KP296068 | 202 | 58% |
| <i>Lolium perenne</i>    |           | KP711088 | 202 | 59% |
| <i>Lolium perenne</i>    |           | KU883513 | 202 | 59% |
| <i>Lolium perenne</i>    |           | LC155933 | 202 | 59% |
| <i>Lolium perenne</i>    |           | MT937119 | 202 | 59% |
| <i>Lolium perenne</i> *  | MW0255247 | MW390905 | 202 | 59% |
| <i>Lolium perenne</i> *  | MW0564348 | MW390906 | 202 | 59% |
| <i>Phleum pratense</i>   |           | EU792341 | 199 | 60% |
| <i>Phleum pratense</i>   |           | HQ600524 | 199 | 60% |
| <i>Phleum pratense</i>   |           | KM523795 | 199 | 60% |
| <i>Phleum pratense</i>   |           | KM523796 | 199 | 60% |
| <i>Phleum pratense</i>   |           | KP711075 | 200 | 60% |
| <i>Phleum pratense</i>   |           | KU883519 | 199 | 60% |
| <i>Phleum pratense</i>   |           | MH500772 | 199 | 60% |
| <i>Phleum pratense</i>   |           | MH628291 | 199 | 60% |
| <i>Phleum pratense</i>   |           | MK050854 | 199 | 60% |
| <i>Phleum pratense</i>   |           | MK050855 | 199 | 60% |
| <i>Phleum pratense</i>   |           | MK804428 | 198 | 61% |
| <i>Phleum pratense</i>   |           | MK804429 | 198 | 60% |
| <i>Phleum pratense</i>   |           | MK804430 | 198 | 60% |
| <i>Phleum pratense</i>   |           | MT796497 | 199 | 60% |
| <i>Phleum pratense</i> * | MW1072502 | MW390907 | 199 | 60% |
| <i>Phleum pratense</i> * | MW0226359 | MW406902 | 199 | 60% |
| <i>Phleum pratense</i> * | MW0226397 | MW390908 | 199 | 60% |
| <i>Poa annua</i>         |           | AF521901 | 199 | 59% |
| <i>Poa annua</i>         |           | AY830447 | 199 | 59% |
| <i>Poa annua</i>         |           | AY830448 | 199 | 59% |
| <i>Poa annua</i>         |           | AY830449 | 199 | 59% |
| <i>Poa annua</i>         |           | AY830450 | 199 | 59% |
| <i>Poa annua</i>         |           | AY830451 | 199 | 59% |
| <i>Poa annua</i>         |           | AY830452 | 199 | 59% |
| <i>Poa annua</i>         |           | EU792386 | 199 | 59% |
| <i>Poa annua</i>         |           | GQ324485 | 199 | 59% |
| <i>Poa annua</i>         |           | JF904811 | 199 | 59% |
| <i>Poa annua</i>         |           | KF713259 | 199 | 59% |
| <i>Poa annua</i>         |           | KF713260 | 199 | 59% |
| <i>Poa annua</i>         |           | KF713261 | 199 | 59% |
| <i>Poa annua</i>         |           | KF713262 | 199 | 59% |
| <i>Poa annua</i>         |           | KF713263 | 199 | 59% |
| <i>Poa annua</i>         |           | KF713264 | 199 | 59% |
| <i>Poa annua</i>         |           | KF713265 | 199 | 59% |
| <i>Poa annua</i>         |           | KF713266 | 199 | 59% |
| <i>Poa annua</i>         |           | KF954522 | 200 | 62% |
| <i>Poa annua</i>         |           | KJ416942 | 199 | 59% |
| <i>Poa annua</i>         |           | KJ599003 | 199 | 59% |
| <i>Poa annua</i>         |           | KJ746813 | 199 | 59% |



|                       |           |          |     |     |
|-----------------------|-----------|----------|-----|-----|
| <i>Poa annua</i>      |           | KP296093 | 199 | 59% |
| <i>Poa annua</i>      |           | KP711086 | 199 | 59% |
| <i>Poa annua</i>      |           | KU883520 | 199 | 59% |
| <i>Poa annua</i>      |           | KU883521 | 199 | 59% |
| <i>Poa annua</i>      |           | MF029728 | 199 | 58% |
| <i>Poa annua</i>      |           | MF405479 | 199 | 59% |
| <i>Poa annua</i>      |           | MH117657 | 199 | 59% |
| <i>Poa annua</i>      |           | MH808877 | 199 | 58% |
| <i>Poa annua*</i>     | MW0242177 | MW390909 | 199 | 59% |
| <i>Poa annua*</i>     | MW0242179 | MW390910 | 199 | 59% |
| <i>Poa pratensis</i>  |           | AF171182 | 200 | 62% |
| <i>Poa pratensis</i>  |           | AF171183 | 200 | 62% |
| <i>Poa pratensis</i>  |           | FJ766176 | 199 | 59% |
| <i>Poa pratensis</i>  |           | GQ324542 | 200 | 62% |
| <i>Poa pratensis</i>  |           | HQ600544 | 200 | 61% |
| <i>Poa pratensis</i>  |           | JF786337 | 200 | 62% |
| <i>Poa pratensis</i>  |           | JF904849 | 200 | 62% |
| <i>Poa pratensis</i>  |           | KF713270 | 200 | 62% |
| <i>Poa pratensis</i>  |           | KF713272 | 200 | 62% |
| <i>Poa pratensis</i>  |           | KJ416938 | 200 | 62% |
| <i>Poa pratensis</i>  |           | KJ434114 | 200 | 62% |
| <i>Poa pratensis</i>  |           | KJ598924 | 200 | 62% |
| <i>Poa pratensis</i>  |           | KP296101 | 200 | 62% |
| <i>Poa pratensis</i>  |           | KP711077 | 200 | 62% |
| <i>Poa pratensis</i>  |           | LC155929 | 200 | 62% |
| <i>Poa pratensis</i>  |           | MF405470 | 200 | 62% |
| <i>Poa pratensis</i>  |           | MH808884 | 200 | 62% |
| <i>Poa pratensis</i>  |           | MH808885 | 200 | 62% |
| <i>Poa pratensis*</i> | MW0564191 | MW390911 | 200 | 62% |
| <i>Poa supina</i>     |           | EF165099 | 199 | 58% |
| <i>Poa supina</i>     |           | EU792387 | 199 | 59% |
| <i>Poa supina</i>     |           | MF405473 | 199 | 58% |
| <i>Poa supina</i>     |           | MF405474 | 199 | 59% |
| <i>Poa supina</i>     |           | MF405475 | 199 | 59% |
| <i>Poa supina*</i>    | MW0560039 | MW390912 | 199 | 58% |
| <i>Poa supina*</i>    | MW0560040 | MW390913 | 199 | 59% |
| <i>Poa trivialis</i>  |           | AF171184 | 200 | 60% |
| <i>Poa trivialis</i>  |           | AF171185 | 200 | 60% |
| <i>Poa trivialis</i>  |           | AF171186 | 200 | 60% |
| <i>Poa trivialis</i>  |           | AF532932 | 199 | 59% |
| <i>Poa trivialis</i>  |           | AJ240161 | 199 | 59% |
| <i>Poa trivialis</i>  |           | GQ324555 | 200 | 60% |
| <i>Poa trivialis</i>  |           | KP296102 | 200 | 60% |
| <i>Poa trivialis</i>  |           | MF405483 | 200 | 60% |
| <i>Poa trivialis</i>  |           | MH117661 | 200 | 61% |
| <i>Poa trivialis</i>  |           | MH117662 | 200 | 61% |

|                                |           |          |     |     |
|--------------------------------|-----------|----------|-----|-----|
| <i>Poa trivialis</i> *         | MW0564230 | MW390914 | 200 | 60% |
| <i>Poa trivialis</i> *         | MW0564234 | MW390915 | 200 | 60% |
| ITS2                           |           |          |     |     |
| <i>Alopecurus pratensis</i>    |           | HQ600523 | 205 | 62% |
| <i>Alopecurus pratensis</i>    |           | KM523762 | 205 | 62% |
| <i>Alopecurus pratensis</i>    |           | MG216008 | 205 | 62% |
| <i>Alopecurus pratensis</i>    |           | MK809298 | 205 | 62% |
| <i>Alopecurus pratensis</i>    |           | MK809299 | 205 | 62% |
| <i>Alopecurus pratensis</i> *  | MW0227587 | MW390993 | 205 | 61% |
| <i>Alopecurus pratensis</i> *  | MW0227686 | MW390994 | 205 | 62% |
| <i>Arrhenatherum elatius</i>   |           | AF019795 | 204 | 61% |
| <i>Arrhenatherum elatius</i>   |           | AM049253 | 204 | 61% |
| <i>Arrhenatherum elatius</i>   |           | DQ336821 | 204 | 61% |
| <i>Arrhenatherum elatius</i>   |           | DQ995405 | 204 | 61% |
| <i>Arrhenatherum elatius</i>   |           | FJ766147 | 202 | 69% |
| <i>Arrhenatherum elatius</i>   |           | FM179388 | 204 | 61% |
| <i>Arrhenatherum elatius</i>   |           | JF904803 | 204 | 60% |
| <i>Arrhenatherum elatius</i>   |           | KP295984 | 204 | 61% |
| <i>Arrhenatherum elatius</i>   |           | KU883487 | 204 | 60% |
| <i>Arrhenatherum elatius</i>   |           | KX165768 | 204 | 61% |
| <i>Arrhenatherum elatius</i>   |           | KX166153 | 204 | 61% |
| <i>Arrhenatherum elatius</i>   |           | KX167459 | 204 | 61% |
| <i>Arrhenatherum elatius</i>   |           | KX872932 | 204 | 61% |
| <i>Arrhenatherum elatius</i>   |           | MG216613 | 204 | 61% |
| <i>Arrhenatherum elatius</i>   |           | MK950949 | 204 | 61% |
| <i>Arrhenatherum elatius</i>   |           | MK950973 | 200 | 63% |
| <i>Arrhenatherum elatius</i>   |           | Z96879   | 204 | 60% |
| <i>Arrhenatherum elatius</i>   |           | Z96881   | 204 | 60% |
| <i>Arrhenatherum elatius</i>   |           | Z96883   | 204 | 60% |
| <i>Arrhenatherum elatius</i> * | MW0200303 | MW390995 | 204 | 61% |
| <i>Arrhenatherum elatius</i> * | MW0235748 | MW390996 | 204 | 61% |
| <i>Briza media</i>             |           | DQ539583 | 204 | 63% |
| <i>Briza media</i>             |           | EU395923 | 205 | 67% |
| <i>Briza media</i>             |           | FM179393 | 204 | 63% |
| <i>Briza media</i>             |           | KP296001 | 204 | 63% |
| <i>Briza media</i>             |           | KU883467 | 204 | 63% |
| <i>Briza media</i>             |           | KU883468 | 204 | 63% |
| <i>Briza media</i>             |           | KU883469 | 204 | 65% |
| <i>Briza media</i>             |           | KU883470 | 204 | 63% |
| <i>Briza media</i>             |           | KX165760 | 204 | 63% |
| <i>Briza media</i>             |           | MT937109 | 204 | 64% |
| <i>Briza media</i> *           | MW0240831 | MW390997 | 205 | 62% |
| <i>Briza media</i> *           | MW0564129 | MW390998 | 205 | 62% |
| <i>Bromus inermis</i>          |           | AY367915 | 205 | 60% |
| <i>Bromus inermis</i>          |           | HQ600548 | 206 | 56% |
| <i>Bromus inermis</i>          |           | JN998985 | 205 | 60% |

|                                 |           |          |     |     |
|---------------------------------|-----------|----------|-----|-----|
| <i>Bromus inermis</i>           |           | KF713192 | 205 | 60% |
| <i>Bromus inermis</i>           |           | KF713193 | 205 | 60% |
| <i>Bromus inermis</i>           |           | KF713194 | 205 | 60% |
| <i>Bromus inermis</i>           |           | KM077290 | 205 | 60% |
| <i>Bromus inermis</i>           |           | KP987400 | 205 | 60% |
| <i>Bromus inermis</i>           |           | KP987401 | 206 | 60% |
| <i>Bromus inermis</i>           |           | KP987402 | 205 | 60% |
| <i>Bromus inermis</i>           |           | KP987403 | 205 | 60% |
| <i>Bromus inermis</i>           |           | KP987404 | 205 | 60% |
| <i>Bromus inermis</i>           |           | KP987405 | 205 | 60% |
| <i>Bromus inermis</i>           |           | KP987406 | 205 | 60% |
| <i>Bromus inermis</i>           |           | KP987407 | 205 | 60% |
| <i>Bromus inermis</i>           |           | KP987408 | 205 | 60% |
| <i>Bromus inermis</i>           |           | KP987409 | 205 | 60% |
| <i>Bromus inermis</i>           |           | KT695169 | 205 | 60% |
| <i>Bromus inermis</i>           |           | MG216247 | 205 | 60% |
| <i>Bromus inermis</i>           |           | MG216270 | 205 | 60% |
| <i>Bromus inermis</i>           |           | MG216772 | 205 | 60% |
| <i>Bromus inermis</i>           |           | MH808794 | 205 | 59% |
| <i>Bromus inermis</i>           |           | MW270937 | 205 | 60% |
| <i>Bromus inermis</i>           |           | MW349610 | 205 | 60% |
| <i>Bromus inermis</i> *         | MW0252346 | MW390999 | 205 | 60% |
| <i>Bromus inermis</i> *         | MW0564336 | MW391000 | 205 | 60% |
| <i>Calamagrostis epigeios</i>   |           | AJ306448 | 204 | 65% |
| <i>Calamagrostis epigeios</i>   |           | AJ306449 | 204 | 65% |
| <i>Calamagrostis epigeios</i>   |           | FJ821781 | 204 | 65% |
| <i>Calamagrostis epigeios</i>   |           | HQ600525 | 204 | 65% |
| <i>Calamagrostis epigeios</i>   |           | KF713208 | 204 | 65% |
| <i>Calamagrostis epigeios</i>   |           | KF713209 | 204 | 65% |
| <i>Calamagrostis epigeios</i>   |           | KF713210 | 204 | 65% |
| <i>Calamagrostis epigeios</i>   |           | KF713211 | 205 | 65% |
| <i>Calamagrostis epigeios</i>   |           | KP711072 | 205 | 65% |
| <i>Calamagrostis epigeios</i>   |           | KU883491 | 204 | 65% |
| <i>Calamagrostis epigeios</i>   |           | KX167057 | 204 | 65% |
| <i>Calamagrostis epigeios</i>   |           | KX872963 | 204 | 65% |
| <i>Calamagrostis epigeios</i>   |           | KX872964 | 204 | 65% |
| <i>Calamagrostis epigeios</i>   |           | KX872965 | 204 | 65% |
| <i>Calamagrostis epigeios</i>   |           | KX872966 | 204 | 66% |
| <i>Calamagrostis epigeios</i>   |           | MT396551 | 204 | 65% |
| <i>Calamagrostis epigeios</i>   |           | MT937110 | 204 | 65% |
| <i>Calamagrostis epigeios</i> * | MW0232221 | MW391001 | 203 | 68% |
| <i>Calamagrostis epigeios</i> * | MW0232325 | MW391002 | 204 | 65% |
| <i>Dactylis glomerata</i>       |           | AF393013 | 199 | 57% |
| <i>Dactylis glomerata</i>       |           | AM503893 | 204 | 60% |

|                             |           |          |     |     |
|-----------------------------|-----------|----------|-----|-----|
| <i>Dactylis glomerata</i>   |           | HQ600543 | 204 | 60% |
| <i>Dactylis glomerata</i>   |           | KF713212 | 204 | 60% |
| <i>Dactylis glomerata</i>   |           | KF713213 | 204 | 60% |
| <i>Dactylis glomerata</i>   |           | KF713214 | 204 | 60% |
| <i>Dactylis glomerata</i>   |           | KF713215 | 204 | 60% |
| <i>Dactylis glomerata</i>   |           | KF713216 | 205 | 60% |
| <i>Dactylis glomerata</i>   |           | KJ598940 | 204 | 60% |
| <i>Dactylis glomerata</i>   |           | KU883493 | 204 | 60% |
| <i>Dactylis glomerata</i>   |           | KX165689 | 204 | 60% |
| <i>Dactylis glomerata</i>   |           | KX166853 | 204 | 60% |
| <i>Dactylis glomerata</i>   |           | KX167535 | 204 | 60% |
| <i>Dactylis glomerata</i>   |           | MG216301 | 204 | 60% |
| <i>Dactylis glomerata</i>   |           | MH808808 | 204 | 60% |
| <i>Dactylis glomerata</i>   |           | MK950948 | 204 | 60% |
| <i>Dactylis glomerata</i>   |           | MK950957 | 204 | 60% |
| <i>Dactylis glomerata</i>   |           | MK950965 | 204 | 58% |
| <i>Dactylis glomerata</i>   |           | MK950970 | 198 | 60% |
| <i>Dactylis glomerata</i>   |           | MK950972 | 204 | 55% |
| <i>Dactylis glomerata</i>   |           | MK950975 | 204 | 58% |
| <i>Dactylis glomerata</i>   |           | MK950976 | 204 | 59% |
| <i>Dactylis glomerata</i>   |           | MK950981 | 204 | 56% |
| <i>Dactylis glomerata</i>   |           | MK950983 | 204 | 59% |
| <i>Dactylis glomerata</i>   |           | MK950989 | 205 | 59% |
| <i>Dactylis glomerata</i>   |           | MK950992 | 205 | 57% |
| <i>Dactylis glomerata</i>   |           | MK950994 | 204 | 58% |
| <i>Dactylis glomerata</i>   |           | MK951000 | 204 | 54% |
| <i>Dactylis glomerata</i>   |           | MK951001 | 197 | 59% |
| <i>Dactylis glomerata</i>   |           | MK951003 | 204 | 55% |
| <i>Dactylis glomerata</i>   |           | MT784108 | 204 | 60% |
| <i>Dactylis glomerata</i>   |           | MT796498 | 204 | 60% |
| <i>Dactylis glomerata</i> * | MW0241080 | MW391003 | 204 | 60% |
| <i>Dactylis glomerata</i> * | MW0241082 | MW391004 | 204 | 60% |
| <i>Elymus repens</i>        |           | DQ859048 | 206 | 63% |
| <i>Elymus repens</i>        |           | DQ859049 | 206 | 63% |
| <i>Elymus repens</i>        |           | DQ859050 | 206 | 63% |
| <i>Elymus repens</i>        |           | DQ859051 | 206 | 63% |
| <i>Elymus repens</i>        |           | FJ793073 | 206 | 63% |
| <i>Elymus repens</i>        |           | FJ793074 | 206 | 63% |
| <i>Elymus repens</i>        |           | FJ793075 | 207 | 59% |
| <i>Elymus repens</i>        |           | FJ793076 | 207 | 61% |
| <i>Elymus repens</i>        |           | FJ793077 | 206 | 63% |
| <i>Elymus repens</i>        |           | FJ793078 | 206 | 63% |
| <i>Elymus repens</i>        |           | FJ793079 | 207 | 61% |
| <i>Elymus repens</i>        |           | FJ793080 | 206 | 63% |
| <i>Elymus repens</i>        |           | FJ793081 | 207 | 60% |
| <i>Elymus repens</i>        |           | FJ793082 | 207 | 61% |

|                          |           |          |     |     |
|--------------------------|-----------|----------|-----|-----|
| <i>Elymus repens</i>     |           | FJ793083 | 206 | 63% |
| <i>Elymus repens</i>     |           | FJ793084 | 206 | 63% |
| <i>Elymus repens</i>     |           | FJ793085 | 206 | 63% |
| <i>Elymus repens</i>     |           | FJ793086 | 207 | 61% |
| <i>Elymus repens</i>     |           | FJ793087 | 207 | 58% |
| <i>Elymus repens</i>     |           | FJ793089 | 207 | 57% |
| <i>Elymus repens</i>     |           | FJ793091 | 207 | 58% |
| <i>Elymus repens</i>     |           | FJ793092 | 205 | 59% |
| <i>Elymus repens</i>     |           | FJ793093 | 206 | 57% |
| <i>Elymus repens</i>     |           | FJ793094 | 205 | 60% |
| <i>Elymus repens</i>     |           | FJ793095 | 204 | 58% |
| <i>Elymus repens</i>     |           | GQ365145 | 206 | 63% |
| <i>Elymus repens</i>     |           | GQ373266 | 206 | 63% |
| <i>Elymus repens</i>     |           | GQ373267 | 206 | 63% |
| <i>Elymus repens</i>     |           | GQ373268 | 206 | 63% |
| <i>Elymus repens</i>     |           | HE602426 | 207 | 64% |
| <i>Elymus repens</i>     |           | HQ600529 | 206 | 63% |
| <i>Elymus repens</i>     |           | JN009804 | 206 | 63% |
| <i>Elymus repens</i>     |           | JN009831 | 206 | 63% |
| <i>Elymus repens</i>     |           | KF713224 | 206 | 63% |
| <i>Elymus repens</i>     |           | KF713225 | 206 | 63% |
| <i>Elymus repens</i>     |           | KF713226 | 206 | 63% |
| <i>Elymus repens</i>     |           | KF713227 | 206 | 63% |
| <i>Elymus repens</i>     |           | KF713228 | 206 | 63% |
| <i>Elymus repens</i>     |           | KF713229 | 206 | 63% |
| <i>Elymus repens</i>     |           | KF713230 | 206 | 63% |
| <i>Elymus repens</i>     |           | KF713231 | 206 | 63% |
| <i>Elymus repens</i>     |           | KP296029 | 206 | 63% |
| <i>Elymus repens</i>     |           | KX165429 | 206 | 63% |
| <i>Elymus repens</i>     |           | KX165922 | 206 | 63% |
| <i>Elymus repens</i>     |           | KX166522 | 206 | 63% |
| <i>Elymus repens</i>     |           | KX166523 | 206 | 63% |
| <i>Elymus repens</i>     |           | MF893160 | 207 | 61% |
| <i>Elymus repens</i>     |           | MF893161 | 205 | 63% |
| <i>Elymus repens</i>     |           | MG215642 | 206 | 63% |
| <i>Elymus repens</i>     |           | MG215738 | 206 | 63% |
| <i>Elymus repens</i>     |           | MG215952 | 206 | 63% |
| <i>Elymus repens</i>     |           | MG216383 | 206 | 63% |
| <i>Elymus repens</i>     |           | MG216489 | 206 | 63% |
| <i>Elymus repens</i>     |           | MG216711 | 206 | 63% |
| <i>Elymus repens</i>     |           | MH500773 | 207 | 63% |
| <i>Elymus repens</i>     |           | MW040314 | 206 | 62% |
| <i>Elymus repens*</i>    | MW0200523 | MW391005 | 206 | 63% |
| <i>Elymus repens*</i>    | MW0564353 | MW391006 | 207 | 65% |
| <i>Festuca pratensis</i> |           | AF171144 | 204 | 64% |
| <i>Festuca pratensis</i> |           | AF171178 | 204 | 64% |

|                            |           |          |     |     |
|----------------------------|-----------|----------|-----|-----|
| <i>Festuca pratensis</i>   |           | AF171179 | 204 | 64% |
| <i>Festuca pratensis</i>   |           | AF171180 | 204 | 65% |
| <i>Festuca pratensis</i>   |           | AF171181 | 204 | 65% |
| <i>Festuca pratensis</i>   |           | AF303421 | 204 | 65% |
| <i>Festuca pratensis</i>   |           | AF532948 | 204 | 64% |
| <i>Festuca pratensis</i>   |           | AJ240151 | 204 | 65% |
| <i>Festuca pratensis</i>   |           | AJ240152 | 204 | 65% |
| <i>Festuca pratensis</i>   |           | EF379042 | 204 | 65% |
| <i>Festuca pratensis</i>   |           | EF379043 | 204 | 65% |
| <i>Festuca pratensis</i>   |           | EF379044 | 204 | 65% |
| <i>Festuca pratensis</i>   |           | EF379045 | 204 | 65% |
| <i>Festuca pratensis</i>   |           | EF379046 | 204 | 64% |
| <i>Festuca pratensis</i>   |           | EF379047 | 204 | 65% |
| <i>Festuca pratensis</i>   |           | HM453173 | 204 | 65% |
| <i>Festuca pratensis</i>   |           | HQ110717 | 204 | 65% |
| <i>Festuca pratensis</i>   |           | JN187604 | 204 | 65% |
| <i>Festuca pratensis</i>   |           | KF917345 | 204 | 65% |
| <i>Festuca pratensis</i>   |           | KF917346 | 204 | 65% |
| <i>Festuca pratensis</i>   |           | KF917347 | 204 | 64% |
| <i>Festuca pratensis</i>   |           | KF917348 | 204 | 65% |
| <i>Festuca pratensis</i>   |           | KF917349 | 205 | 63% |
| <i>Festuca pratensis</i>   |           | KJ598995 | 204 | 65% |
| <i>Festuca pratensis</i>   |           | KP296039 | 204 | 65% |
| <i>Festuca pratensis</i>   |           | KX165839 | 204 | 65% |
| <i>Festuca pratensis</i>   |           | KX166184 | 204 | 65% |
| <i>Festuca pratensis</i>   |           | KX166353 | 204 | 65% |
| <i>Festuca pratensis</i>   |           | MG216166 | 204 | 60% |
| <i>Festuca pratensis</i>   |           | MK950955 | 204 | 65% |
| <i>Festuca pratensis</i>   |           | MT145299 | 204 | 65% |
| <i>Festuca pratensis</i> * | MW0249535 | MW391007 | 204 | 65% |
| <i>Festuca pratensis</i> * | MW0564330 | MW391008 | 204 | 65% |
| <i>Lolium perenne</i>      |           | AF171143 | 204 | 64% |
| <i>Lolium perenne</i>      |           | AF171171 | 204 | 64% |
| <i>Lolium perenne</i>      |           | AF171172 | 204 | 64% |
| <i>Lolium perenne</i>      |           | AF171173 | 204 | 64% |
| <i>Lolium perenne</i>      |           | AF303401 | 204 | 64% |
| <i>Lolium perenne</i>      |           | AJ240137 | 204 | 64% |
| <i>Lolium perenne</i>      |           | AJ240138 | 204 | 64% |
| <i>Lolium perenne</i>      |           | EF379073 | 204 | 64% |
| <i>Lolium perenne</i>      |           | EF379074 | 204 | 64% |
| <i>Lolium perenne</i>      |           | EF379075 | 204 | 64% |
| <i>Lolium perenne</i>      |           | FJ766169 | 204 | 64% |
| <i>Lolium perenne</i>      |           | HM453191 | 204 | 64% |
| <i>Lolium perenne</i>      |           | JN187605 | 204 | 64% |
| <i>Lolium perenne</i>      |           | KC478378 | 204 | 63% |
| <i>Lolium perenne</i>      |           | KC478379 | 204 | 64% |

|                          |           |          |     |     |
|--------------------------|-----------|----------|-----|-----|
| <i>Lolium perenne</i>    |           | KC478380 | 204 | 63% |
| <i>Lolium perenne</i>    |           | KC478381 | 204 | 63% |
| <i>Lolium perenne</i>    |           | KC478382 | 204 | 63% |
| <i>Lolium perenne</i>    |           | KC478383 | 204 | 63% |
| <i>Lolium perenne</i>    |           | KF454873 | 204 | 63% |
| <i>Lolium perenne</i>    |           | KF713246 | 204 | 64% |
| <i>Lolium perenne</i>    |           | KF713247 | 204 | 64% |
| <i>Lolium perenne</i>    |           | KF713248 | 204 | 64% |
| <i>Lolium perenne</i>    |           | KF713249 | 204 | 64% |
| <i>Lolium perenne</i>    |           | KJ598999 | 204 | 64% |
| <i>Lolium perenne</i>    |           | KP205445 | 204 | 64% |
| <i>Lolium perenne</i>    |           | KP296068 | 204 | 64% |
| <i>Lolium perenne</i>    |           | KP711088 | 204 | 64% |
| <i>Lolium perenne</i>    |           | KU883513 | 204 | 64% |
| <i>Lolium perenne</i>    |           | KX167358 | 204 | 64% |
| <i>Lolium perenne</i>    |           | MK950959 | 204 | 64% |
| <i>Lolium perenne</i>    |           | MT937119 | 204 | 64% |
| <i>Lolium perenne</i> *  | MW0255247 | MW391009 | 204 | 64% |
| <i>Lolium perenne</i> *  | MW0564348 | MW391010 | 204 | 64% |
| <i>Phleum pratense</i>   |           | EU792341 | 203 | 65% |
| <i>Phleum pratense</i>   |           | HQ600524 | 203 | 65% |
| <i>Phleum pratense</i>   |           | KM523795 | 203 | 65% |
| <i>Phleum pratense</i>   |           | KM523796 | 203 | 65% |
| <i>Phleum pratense</i>   |           | KP711075 | 203 | 65% |
| <i>Phleum pratense</i>   |           | KT695278 | 203 | 65% |
| <i>Phleum pratense</i>   |           | KU883519 | 203 | 65% |
| <i>Phleum pratense</i>   |           | KX166532 | 203 | 65% |
| <i>Phleum pratense</i>   |           | KX167871 | 203 | 65% |
| <i>Phleum pratense</i>   |           | KX167988 | 203 | 65% |
| <i>Phleum pratense</i>   |           | MG216334 | 203 | 65% |
| <i>Phleum pratense</i>   |           | MH500772 | 203 | 65% |
| <i>Phleum pratense</i>   |           | MH628291 | 204 | 64% |
| <i>Phleum pratense</i>   |           | MK050854 | 204 | 64% |
| <i>Phleum pratense</i>   |           | MK050855 | 203 | 65% |
| <i>Phleum pratense</i>   |           | MK804428 | 203 | 65% |
| <i>Phleum pratense</i>   |           | MK804429 | 203 | 65% |
| <i>Phleum pratense</i>   |           | MK804430 | 203 | 65% |
| <i>Phleum pratense</i>   |           | MK950961 | 203 | 65% |
| <i>Phleum pratense</i>   |           | MT796497 | 203 | 65% |
| <i>Phleum pratense</i> * | MW1072502 | MW391011 | 203 | 65% |
| <i>Phleum pratense</i> * | MW0226359 | MW410924 | 203 | 65% |
| <i>Phleum pratense</i> * | MW0226397 | MW391012 | 203 | 65% |
| <i>Poa annua</i>         |           | AF521901 | 205 | 60% |
| <i>Poa annua</i>         |           | AY830447 | 202 | 60% |
| <i>Poa annua</i>         |           | AY830448 | 202 | 60% |
| <i>Poa annua</i>         |           | AY830449 | 202 | 60% |

|                      |           |          |     |     |
|----------------------|-----------|----------|-----|-----|
| <i>Poa annua</i>     |           | AY830450 | 202 | 60% |
| <i>Poa annua</i>     |           | AY830451 | 202 | 60% |
| <i>Poa annua</i>     |           | AY830452 | 202 | 60% |
| <i>Poa annua</i>     |           | EU792386 | 202 | 60% |
| <i>Poa annua</i>     |           | FM179428 | 202 | 60% |
| <i>Poa annua</i>     |           | GQ324485 | 202 | 60% |
| <i>Poa annua</i>     |           | JF904811 | 202 | 60% |
| <i>Poa annua</i>     |           | KF713259 | 202 | 60% |
| <i>Poa annua</i>     |           | KF713260 | 202 | 60% |
| <i>Poa annua</i>     |           | KF713261 | 202 | 60% |
| <i>Poa annua</i>     |           | KF713262 | 202 | 60% |
| <i>Poa annua</i>     |           | KF713263 | 202 | 60% |
| <i>Poa annua</i>     |           | KF713264 | 202 | 60% |
| <i>Poa annua</i>     |           | KF713265 | 202 | 60% |
| <i>Poa annua</i>     |           | KF713266 | 204 | 60% |
| <i>Poa annua</i>     |           | KF954522 | 202 | 64% |
| <i>Poa annua</i>     |           | KJ416942 | 202 | 60% |
| <i>Poa annua</i>     |           | KJ599003 | 202 | 60% |
| <i>Poa annua</i>     |           | KJ746813 | 202 | 60% |
| <i>Poa annua</i>     |           | KP296093 | 202 | 60% |
| <i>Poa annua</i>     |           | KP711086 | 202 | 60% |
| <i>Poa annua</i>     |           | KT948634 | 202 | 60% |
| <i>Poa annua</i>     |           | KU883520 | 202 | 60% |
| <i>Poa annua</i>     |           | KU883521 | 202 | 60% |
| <i>Poa annua</i>     |           | KX165956 | 202 | 60% |
| <i>Poa annua</i>     |           | KX166730 | 202 | 60% |
| <i>Poa annua</i>     |           | MF029728 | 202 | 59% |
| <i>Poa annua</i>     |           | MF405479 | 202 | 60% |
| <i>Poa annua</i>     |           | MG216458 | 202 | 60% |
| <i>Poa annua</i>     |           | MH117657 | 202 | 60% |
| <i>Poa annua</i>     |           | MH808877 | 202 | 60% |
| <i>Poa annua</i>     |           | MN453601 | 202 | 64% |
| <i>Poa annua</i> *   | MW0242177 | MW391013 | 202 | 60% |
| <i>Poa annua</i> *   | MW0242179 | MW391014 | 202 | 60% |
| <i>Poa pratensis</i> |           | AF171182 | 202 | 65% |
| <i>Poa pratensis</i> |           | AF171183 | 202 | 65% |
| <i>Poa pratensis</i> |           | FJ766176 | 202 | 60% |
| <i>Poa pratensis</i> |           | GQ324542 | 202 | 64% |
| <i>Poa pratensis</i> |           | HQ600544 | 202 | 64% |
| <i>Poa pratensis</i> |           | JF786337 | 202 | 64% |
| <i>Poa pratensis</i> |           | JF904849 | 202 | 64% |
| <i>Poa pratensis</i> |           | JN999397 | 200 | 64% |
| <i>Poa pratensis</i> |           | KF713270 | 202 | 64% |
| <i>Poa pratensis</i> |           | KF713272 | 202 | 65% |
| <i>Poa pratensis</i> |           | KJ416938 | 202 | 64% |
| <i>Poa pratensis</i> |           | KJ434114 | 202 | 64% |



|                        |           |          |     |     |
|------------------------|-----------|----------|-----|-----|
| <i>Poa pratensis</i>   |           | KJ598924 | 202 | 65% |
| <i>Poa pratensis</i>   |           | KJ598925 | 202 | 64% |
| <i>Poa pratensis</i>   |           | KP296101 | 202 | 65% |
| <i>Poa pratensis</i>   |           | KP711077 | 202 | 65% |
| <i>Poa pratensis</i>   |           | KT960120 | 200 | 64% |
| <i>Poa pratensis</i>   |           | KT960157 | 202 | 64% |
| <i>Poa pratensis</i>   |           | KT960177 | 200 | 64% |
| <i>Poa pratensis</i>   |           | KT960264 | 202 | 63% |
| <i>Poa pratensis</i>   |           | KT960322 | 202 | 63% |
| <i>Poa pratensis</i>   |           | KX166874 | 202 | 64% |
| <i>Poa pratensis</i>   |           | KX166875 | 202 | 65% |
| <i>Poa pratensis</i>   |           | KX166881 | 202 | 64% |
| <i>Poa pratensis</i>   |           | KY460959 | 202 | 61% |
| <i>Poa pratensis</i>   |           | MF405470 | 202 | 64% |
| <i>Poa pratensis</i>   |           | MG216036 | 202 | 65% |
| <i>Poa pratensis</i>   |           | MG216531 | 202 | 63% |
| <i>Poa pratensis</i>   |           | MH808884 | 202 | 65% |
| <i>Poa pratensis</i>   |           | MH808885 | 202 | 64% |
| <i>Poa pratensis</i>   |           | MK950952 | 202 | 65% |
| <i>Poa pratensis</i>   |           | MW112820 | 202 | 63% |
| <i>Poa pratensis</i>   |           | MW112821 | 202 | 65% |
| <i>Poa pratensis</i>   |           | MW112822 | 202 | 64% |
| <i>Poa pratensis</i>   |           | MW112823 | 202 | 65% |
| <i>Poa pratensis</i>   |           | MW112824 | 202 | 65% |
| <i>Poa pratensis</i>   |           | MW112825 | 202 | 64% |
| <i>Poa pratensis</i>   |           | MW112826 | 202 | 64% |
| <i>Poa pratensis</i>   |           | MW112827 | 202 | 64% |
| <i>Poa pratensis</i>   |           | MW112828 | 202 | 65% |
| <i>Poa pratensis</i>   |           | MW112829 | 202 | 64% |
| <i>Poa pratensis</i> * | MW0564191 | MW391015 | 202 | 65% |
| <i>Poa supina</i>      |           | EF165099 | 202 | 60% |
| <i>Poa supina</i>      |           | EU792387 | 202 | 61% |
| <i>Poa supina</i>      |           | MF405473 | 202 | 60% |
| <i>Poa supina</i>      |           | MF405474 | 202 | 60% |
| <i>Poa supina</i>      |           | MF405475 | 202 | 60% |
| <i>Poa supina</i> *    | MW0560039 | MW391016 | 202 | 60% |
| <i>Poa supina</i> *    | MW0560040 | MW391017 | 202 | 60% |
| <i>Poa trivialis</i>   |           | AF171184 | 202 | 63% |
| <i>Poa trivialis</i>   |           | AF171185 | 202 | 63% |
| <i>Poa trivialis</i>   |           | AF171186 | 202 | 63% |
| <i>Poa trivialis</i>   |           | AF532932 | 199 | 63% |
| <i>Poa trivialis</i>   |           | AJ240161 | 199 | 63% |
| <i>Poa trivialis</i>   |           | GQ324555 | 202 | 62% |
| <i>Poa trivialis</i>   |           | KP296102 | 202 | 63% |
| <i>Poa trivialis</i>   |           | KX166151 | 202 | 63% |
| <i>Poa trivialis</i>   |           | KX166877 | 202 | 63% |

|                        |           |          |     |     |
|------------------------|-----------|----------|-----|-----|
| <i>Poa trivialis</i>   |           | KX167368 | 202 | 63% |
| <i>Poa trivialis</i>   |           | MF405483 | 202 | 63% |
| <i>Poa trivialis</i>   |           | MH117661 | 202 | 64% |
| <i>Poa trivialis</i>   |           | MH117662 | 202 | 64% |
| <i>Poa trivialis</i>   |           | MK950950 | 202 | 63% |
| <i>Poa trivialis</i>   |           | MK950997 | 193 | 64% |
| <i>Poa trivialis</i> * | MW0564230 | MW391018 | 202 | 63% |
| <i>Poa trivialis</i> * | MW0564234 | MW391019 | 202 | 63% |

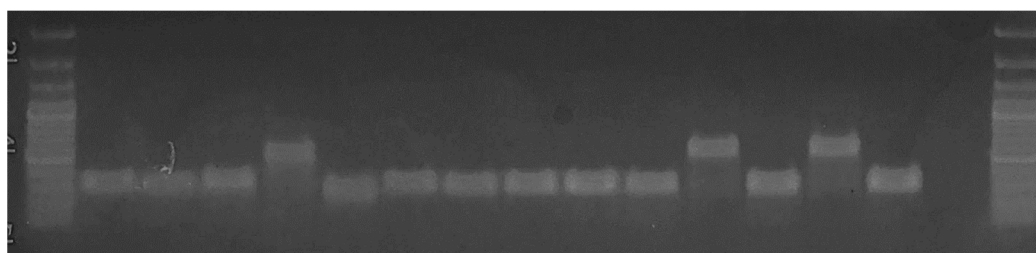

**Supplementary Figure S1.** PCR test results with primers ETS-Fmix + 18S\_start\_R; from left to right: GeneRuler 100bp Plus DNA Ladder (Thermo Scientific, USA), *Alopecurus pratensis* MW0227686, *Arrhenatherum elatius* MW0235748, *Briza media* MW0564129, *Bromus inermis* MW0564336, *Calamagrostis epigeios* MW0232325, *Dactylis glomerata* MW0241080, *Elymus repens* MW0564353, *Festuca pratensis* MW0564330, *Lolium perenne* MW0255247, *Phleum pratense* MW0226397, *Poa annua* MW0242177, *Poa pratensis* MW0564191, *Poa supina* MW0560039, *Poa trivialis* MW0564230, NTC;

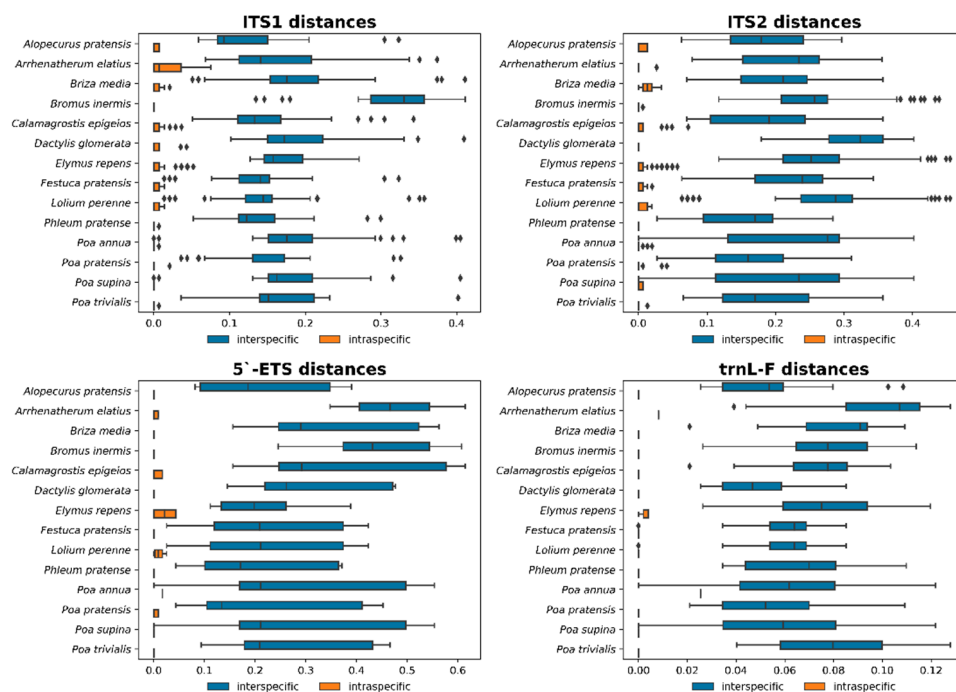

**Supplementary Figure S2.** Barcodes' intra- and interspecific distances per species.
